# Supplementary material for: Diabetes Prevalence Among Racial-Ethnic Minority Group Members With Severe Mental Illness Taking Antipsychotics: Double Jeopardy?
Source: Atypon-hosted journal article supplement (doi:10.1176/appi.ps.201600356), 2017-04-17
Supplement: appi.ps.201600356.ds001.pdf [file appi.ps.201600356.ds001.pdf]

 


Psychiatry Online
